# Supplementary material for: Effects of imidazole on the thermal and conductivity properties of hybrid membrane based on poly(vinyl alcohol)/SiO2
Source: Royal Society of Chemistry journal article supplement (doi:10.1039/c2jm30975k), 2012-01-01
Supplement: c2jm30975k.pdf [file c2jm30975k.pdf]

## Synthesis of PVA/imidazole/SiO<sub>2</sub> hybrid membrane

Imidazole (C<sub>3</sub>H<sub>4</sub>N<sub>2</sub>, Wako, Japan), tetraethoxysilane (Si(OC<sub>2</sub>H<sub>5</sub>)<sub>4</sub>, TEOS, 99.9 %, Colcote, Japan) and poly(vinyl alcohol) with a molecular weight of 100,000 g/mol (Nacalai Tesque, Japan) were used as raw materials. De-ionized water was purified using a Millipore Gradient Milli-Q<sup>®</sup> water purification system. Solvents and reagents of analytical grade were commercial products and used as obtained.

The hybrid membranes were prepared by a sol-gel process. An appropriate amount of PVA was dissolved in deionized water and stirred at 90 °C. Imidazole was also dissolved in deionized water, stirred at 80 °C for 4 h after which the two mixtures were mixed together and stirred at 90 °C for 12 h, to obtain an aqueous solution. The solution was then cooled to room temperature and 2 ml of TEOS was added. Gelation process was carried out for 12 h. The final solution was cast on a glass plate or Teflon mold to a desired thickness and dried at room temperature for 1 week. This was followed by a heat treatment at 60 °C for 6 h under nitrogen condition. The preparation flow chart and structure of the hybrid network are shown in Fig. S1.

## Surface morphology

Fig. S2 illustrates surface morphology of the PVA/imidazole/SiO<sub>2</sub> hybrid membranes by SEM micrographs with various magnifications. The surface morphologies of the materials were observed at several angles (10–50 μm). The micrographs in Fig. S2 a-e, display a dense structure, because of well dispersion of SiO<sub>2</sub> and imidazole in the composite film. The concentrations of PVA and imidazole

were significant factors affecting the formation of these homogenous gels by sol-gel method. Completely mixed phases were observed on the surface of the formed composite membrane without separation. Fig. S2a-e reveals that smooth and ionic clusters were formed on the surface of the composite membrane. These ionic clusters facilitate the transportation process of proton; therefore, the corresponding proton conductivity would be enhanced.

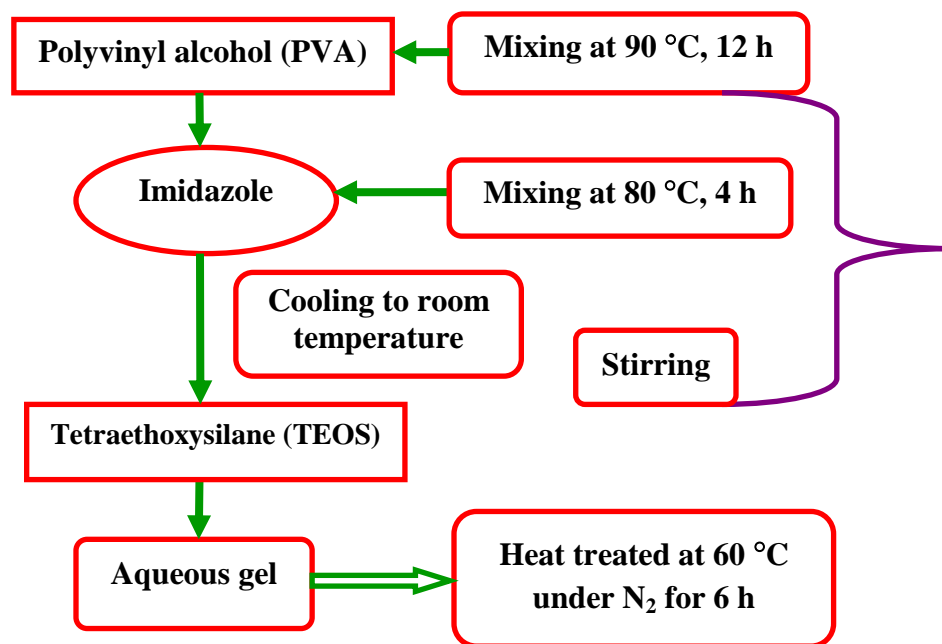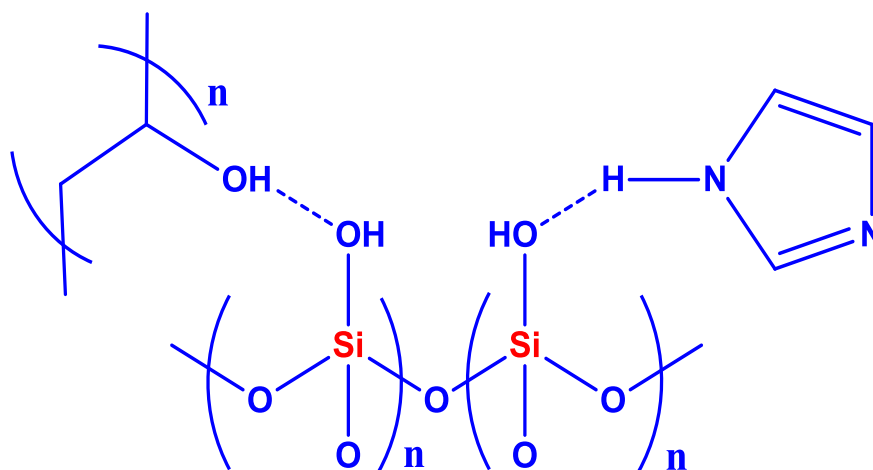

**Fig. S1** A flow chart of the preparation and the structural networks of the PVA/imidazole/SiO<sub>2</sub> hybrid membrane.

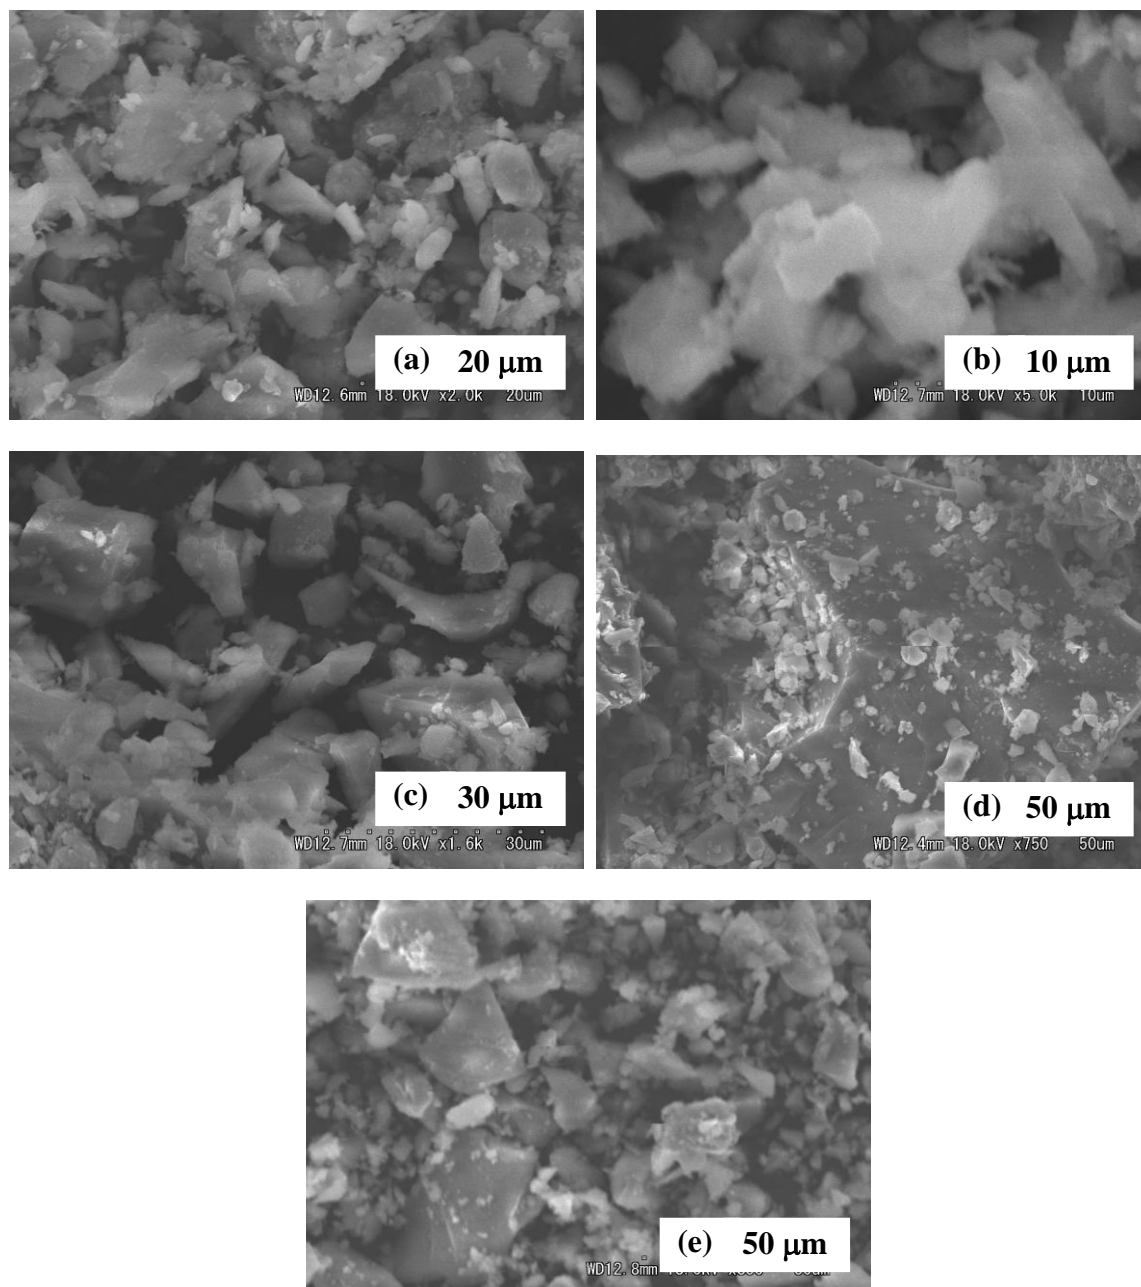

**Fig. S2** SEM micrographs of the PVA/imidazole/SiO<sub>2</sub> hybrid composite membranes: (a) 90/10 wt%/2 ml, (b) 80/20 wt%/2 ml, (c) 70/30 wt%/2 ml, (d) 60/40 wt%/2 ml and (e) 50/50 wt%/2 ml.
